# Supplementary material
Source: PubMed Central journal article supplement (PMC1440319)
Supplement: 7601044s2.pdf [file 7601044s2.pdf]

Consensus 1:DN; 2:EQ; 3:ST; 4:KR; 5:FYW; 6:LIV 7:ED; 8:LIVMFCAYW

```

*      20      *      40      *      60      *      80      *      100
rab8  : -----MAKTYDYLFKLLLLIGDSGVGKTCVLFKRFSEDAFNSTFISTIGIDFKIRTIELDGGKRIKLIQIWDTAGQERFRITITAYYRGAMGIML : 86
rab3a : MASATDSRYGQKESSDQNFDFYMFKILIIIGNSSVGKTSFLFRYADDSFTPAFVSTVGVDFKVKTIYRNDKRIKLIQIWDTAGQERYRTITAYYRGAMGFIL : 100
rab1a : -----MSSMNPEYDYLFKLLLLIGDSGVGKSCLLLRFADDTYTESYISTIGVDFKIRTIELDGGKTIKLIQIWDTAGQERFRITITSSYYRGAHGIIIV : 89
ypt1  : -----MNSEYDYLFKLLLLIGNSSVGKSCLLLRFSDDTYTNDYISTIGVDFKIKTVELDGGKTVKLIQIWDTAGQERFRITITSSYYRGSHGIII : 86
rab10 : -----MAKKTYYDLFKLLLLIGDSGVGKTCVLFKRFSDAFNTTFISTIGIDFKIKTVELQGGKIKLIQIWDTAGQERFHTITSSYYRGAMGIML : 87
sec4  : --MSGLRTVSASSGNGKSYDSIMKILLIGDSGVGKSCLLVRFVEDKFNPSFITITIGIDFKIKTVDINGKVKLQLWDTAGQERFRITITAYYRGAMGIIL : 98
cons. :                5D 8K86L6IG1S V GK3 8L8R5 7D 5 563T6G6DFK64T6 K 6KLQ6WDTAGQER5 TIT3 YYRG G886
rab5a : --MASRGATRPNGPNTGNKICQFKLVLLGESAVGKSSLVLRVFKGQFHEFQESTIGAAFLTQTVCLDDTTVKFEIWDTAGQERYHSLAPMYRGAQAIV : 98
rab6  : -----MSTGGDFGNPLRKFKLVFLGEQSVGKTSLITRFMYDSFDNTYQATIGIDFLSKTMYLEDRTVRLQLWDTAGQERFRSLIPSYIRDSTVAVV : 91
rab11 : -----MGTRDDEYDYLFKVVLLIGDSGVGKSNLLSRFTRNEFNLESKSTIGVEFATRISIQVDGKTIKAQIWDTAGQERYRAITSAYYRGAVGALL : 89
rab4  : -----MSQTAMSETYDFLFKFLVIGNAGTGKSCLLHQFIEKKFKDSDNHTIGVEFGSKIINVGGKYVKLIQIWDTAGQERFRSVTRSYYRGAAGALL : 91
rab7  : -----MTRSRKVLKVIILGDSGVGKTSLMNQYVKNKFSNQYKATIGADFLTKEVMVDDRLVTMQIWDTAGQERFQSLGVAFYRGADCCVL : 86
rab9a : -----MAGKSSLFKVILLGDGGVKGKSSLMNRYVTNKFDFTQLFHTIGVEFLNKDLEVDGHFVTMQIWDTAGQERFRSLRTPFYRGSDCCLL : 85
cons. :                8K8686G GK3 88 5 5 T6G8 F 8 6 826WDTAGQER5 6 58R 886

```

```

*      120     *      140     *      160     *      180     *      200
rab8  : VYDITNEKSFNIRNWRNIEEHAS----ADVEKMILGNKCDVNDKRQVSKERGEKLALDYGKFMETSAKANINVENAFFTLARDIKAKMDKKLEGNSP : 182
rab3a : MYDITNEESFNAVQDWSTQIKTYSW----DNAQVLLVGNKCDMEDERVVSSERGRQLADHLGFEFFEASAKDNINVKQTFERLVDVICEKMSESLDTADP : 196
rab1a : VYDVTDQESFNQVQWLQEI DRYAS----ENVNKLVLGNKCDLTKKVVDTTAKAFADSLGIPFLETSAKNATNVEQSFMTMAAEIKKRMGPG----AT : 181
ypt1  : VYDVTDQESFNQVQWLQEI DRYAT----STVLKLLVGNKCDLTKKRVVEYDVAKEFADANKMPFLETSAKDSTNVEDAFLTMARQIKESMSQQNLNETT : 182
rab10 : VYDITNGKSFENISKWLRNIDEHAN----EDVERMLLGNKCDMDKRVVPGKGGQIAREHGIRFFETSAKANINIEKAFLTLAEDILRKTTPVK-EPNS- : 181
sec4  : VYDVTDERFTFTNIKQWFKTVNEHAN----DEAQLLLVGNKSDMET-RVVTADQGEALAKELGIPFIESSAKNDDNVNEIFFTLAKLIQEKIDSNKLVGVG : 193
cons. : 8YD6T1 3F 6 W 6 8 866GNK D8 4 V 8A 8 F8E SA N6 F 88 I
rab5a : VYDITNEESFARAKNWKELQRQAS----PNIVIALSGNKADLANKRAVDVFQEAQSYADDNSLLFMETSAKTSMNVNEIFMAIAKKLPKNPQNPGANSA : 194
rab6  : VYDITNVNSFQQTTKWIDDVTERG----SDVIIMLVGNKTDLADKRQVSIIEGERKAKELNVMFIETSAKAGYNVKQLFRRVAAALPGMESTQDRSRED : 187
rab11 : VYDIAKHLTYENVERWLKELRDHAD----SNIVIMLVGNKSDLRHLRAVPTDEARAFAEKNGLSFIETSAKDSTNVEAAFQTLTEIYRIVSQKQMSDRR : 185
rab4  : VYDITSRETYNALTNWLT DARMAS----QNIVIIILCGNKDLADREVTFLEASRFAQENELMFLETSAKTGENVEEAFVQCARKILNKIESGELDPER : 187
rab7  : VFDVTAPNTFKTLD SWRDEF LIQASPRDPENFPFVVLGNKIDLENRQVATKRAQAWCYSKNNIPYFETSAKEAINVEQAFQTIARNALKQETEVELYNEF : 186
rab9a : TFSVDDSQSFQNL SNWKKEFIYYADVKEPESFPFVILGNKIDISERQVSTEEAQAWCRDNGDYPFYFETSAKDATNVAAAFEEAVRRVLATEDRSDHLIQT : 185
cons. : 5 6 35 W 8 8 86 GNK D8 8 58E SA N6 F 88 8

```
